# Supplementary material
Source: MDPI journal article supplement (https://www.mdpi.com/2073-4344/12/7/739)
Supplement: s1 [file s1]

# The High Electrocatalytic Performance of NiFeSe/CFP for Hydrogen Evolution Reaction Derived from a Prussian Blue Analogue

Yajie Guo <sup>1</sup>, Yongjie Liu <sup>1</sup>, Yanrong Liu <sup>2</sup>, Chunrui Zhang <sup>1</sup>, Kelun Jia <sup>1</sup>, Jibo Su <sup>1</sup> and Ke Wang <sup>2,\*</sup>

<sup>1</sup> School of Materials Science and Engineering, Chang'an University, Xi'an 710064, China; yjguo@chd.edu.cn (Y.G.); 2021131039@chd.edu.cn (Y.J.L.); 2018131016@chd.edu.cn (C.Z.); 2020131033@chd.edu.cn (K.J.); 2019904173@chd.edu.cn (J.S.)

<sup>2</sup> Beijing Key Laboratory of Ionic Liquids Clean Process, CAS Key Laboratory of Green Process and Engineering, State Key Laboratory of Multiphase Complex Systems, Institute of Process Engineering, Chinese Academy of Sciences, Beijing 100190, China; yrliu@ipe.ac.cn

\* Correspondence: kewang@ipe.ac.cn

**Abstract:** Non-noble-metal-based chalcogenides are promising candidates for hydrogen evolution reaction (HER) by harnessing the architectural design and the synergistic effect between the elements. Herein, a porous bimetallic selenide (NiFeSe) nanocube deposited on carbon fiber paper (NiFeSe/CFP) was synthesized through a facile selenization reaction based on Prussian blue analogues (PBAs) as precursors. The NiFeSe/CFP exhibited excellent HER activity with an overpotential of just 186 mV for a current density of 10 mA cm<sup>-2</sup> in 1.0 M KOH at ambient temperature, similar to most of the state-of-the-art transition metal chalcogenides. The corresponding Tafel slope was calculated to be 52 mV dec<sup>-1</sup>, indicating fast discharge of the proton during the HER. Furthermore, the catalyst could endure long-term catalytic tests and showed remarkable durability. The enhanced electrocatalytic performance of NiFeSe/CFP is attributed to the unique 3D porous configuration inherited from the PBA templates, enhanced charge transfer occurring at the heterogeneous interface due to the synergistic effect between the bimetallic phases, and the high conductivity improved by the formation of amorphous carbon shells during the selenization. These findings prove that the combination of inexpensive metal-organic framework precursors and hybrid metallic compounds is a feasible way to realize the performance enhancement of non-noble-metal-based chalcogenides towards alkaline HER.

**Keywords:** transition metal chalcogenides; hydrogen-evolution reaction; Prussian blue analogue; multi-component hybrid structures

**Citation:** Guo, Y.; Liu, Y.; Liu, Y.; Zhang, C.; Jia, K.; Su, J.; Wang, K. The High Electrocatalytic Performance of NiFeSe/CFP for Hydrogen Evolution Reaction Derived from a Prussian Blue Analogue. *Catalysts* **2022**, *12*, x. <https://doi.org/10.3390/catal12070739>

Academic Editor: Vincenzo Baglio

Received: 31 May 2022

Accepted: 29 June 2022

Published: 4 July 2022

**Publisher's Note:** MDPI stays neutral with regard to jurisdictional claims in published maps and institutional affiliations.

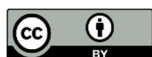

**Copyright:** © 2022 by the authors. Licensee MDPI, Basel, Switzerland. This article is an open access article distributed under the terms and conditions of the Creative Commons Attribution (CC BY) license (<http://creativecommons.org/licenses/by/4.0/>).

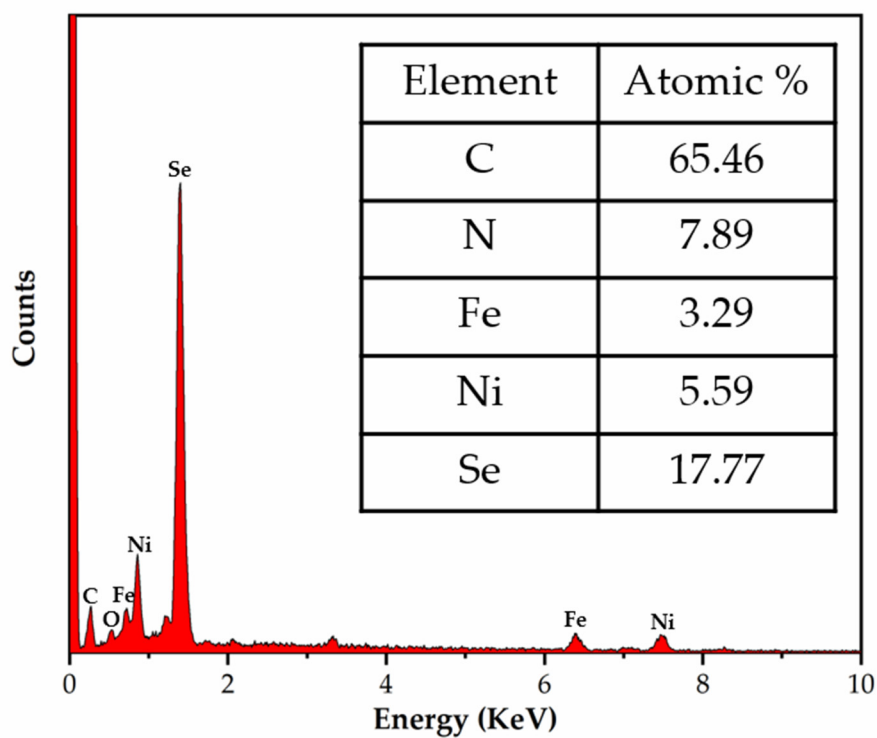

**Figure S1.** EDS spectrum of NiFeSe/CFP in FESEM.

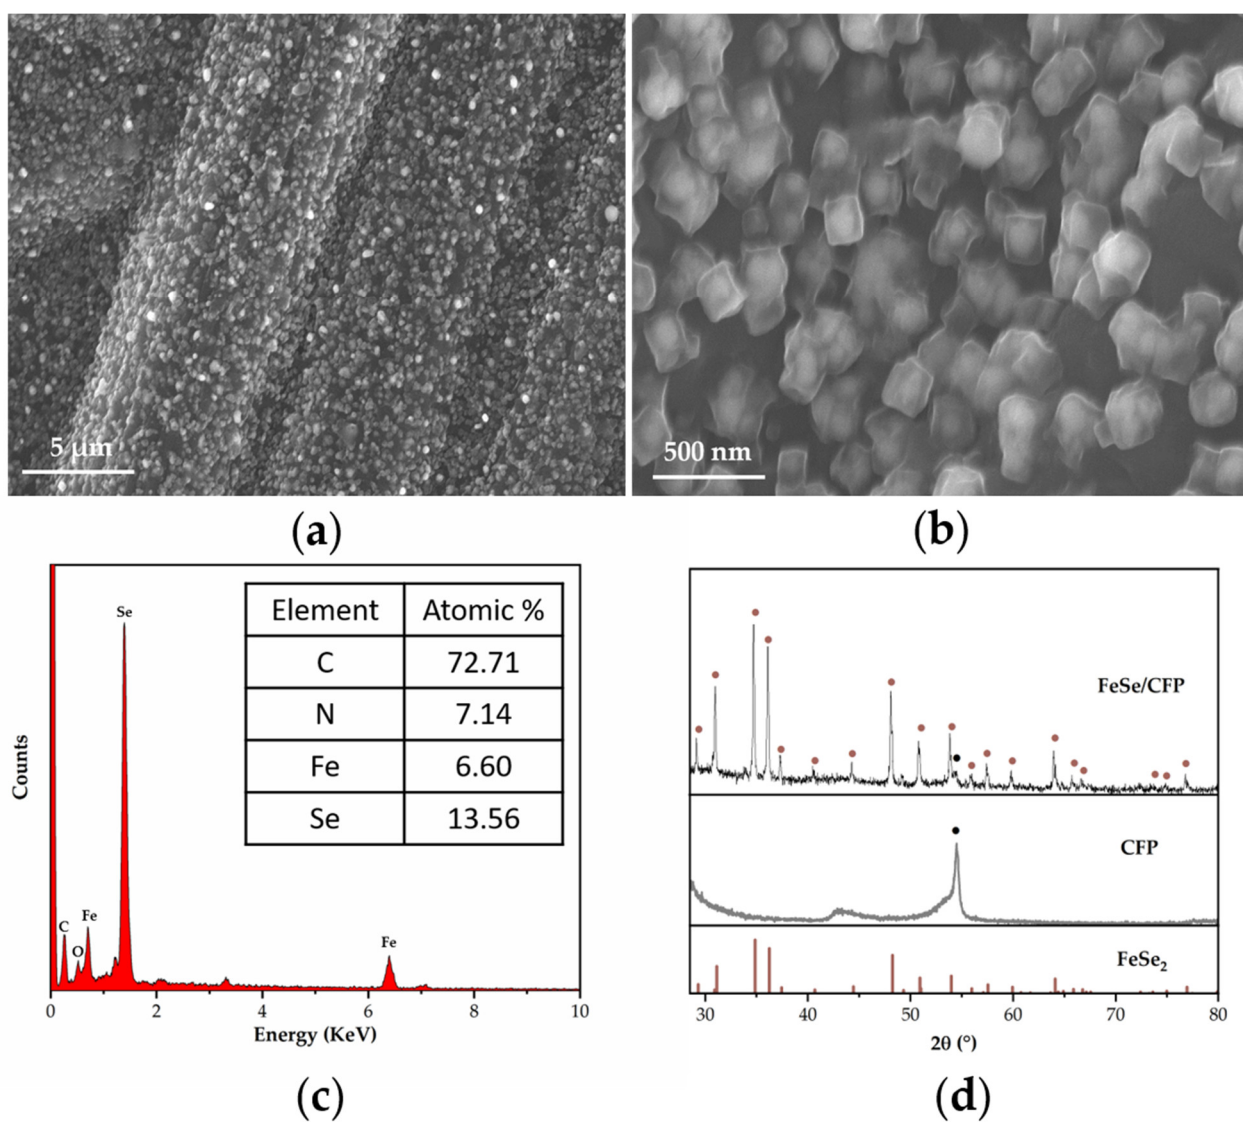

**Figure S2.** (a,b) FESEM images, (c) EDS spectrum, (d) XRD pattern of FeSe/CFP and the reference pattern of FeSe<sub>2</sub> (brown, ICDD: 97-004-2115). The peaks marked with black dots correspond to CFP substrate.

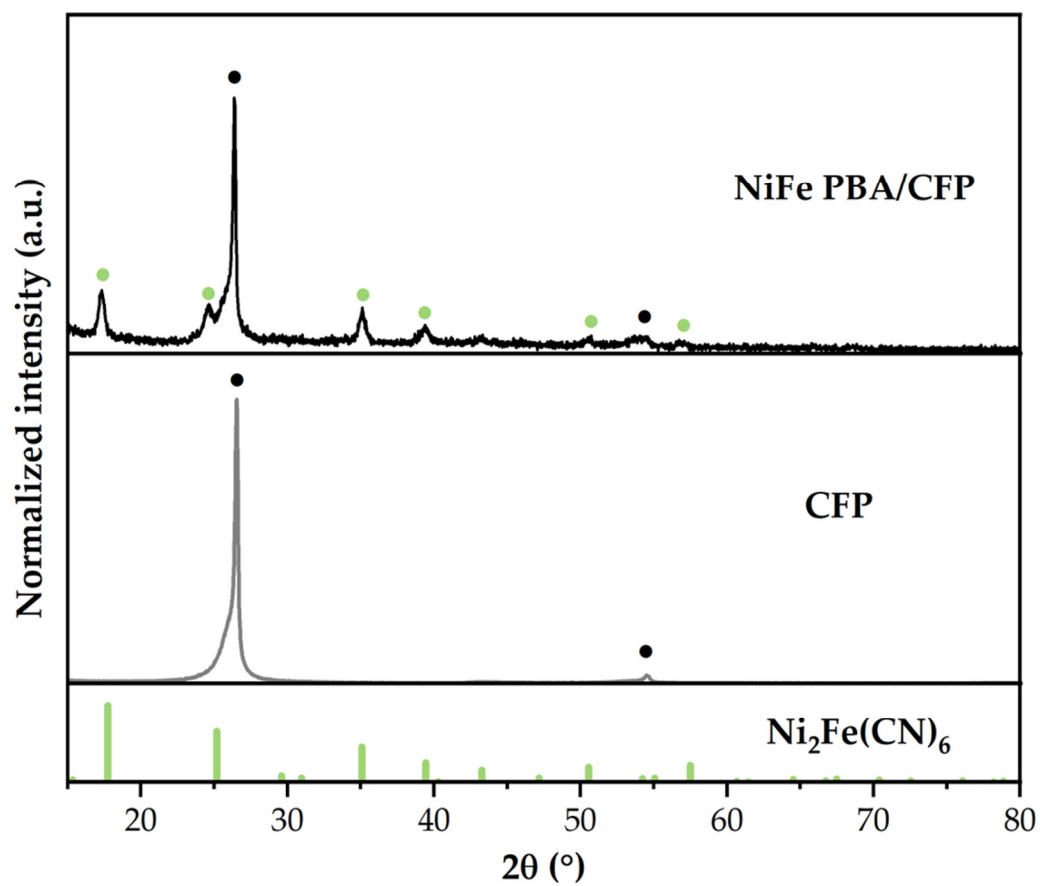

**Figure S3.** XRD spectra of NiFe PBA/CFP and the reference pattern of Ni<sub>2</sub>Fe(CN)<sub>6</sub> (green, ICDD: 01-075-0037). The peaks marked with black dots correspond to CFP substrate.

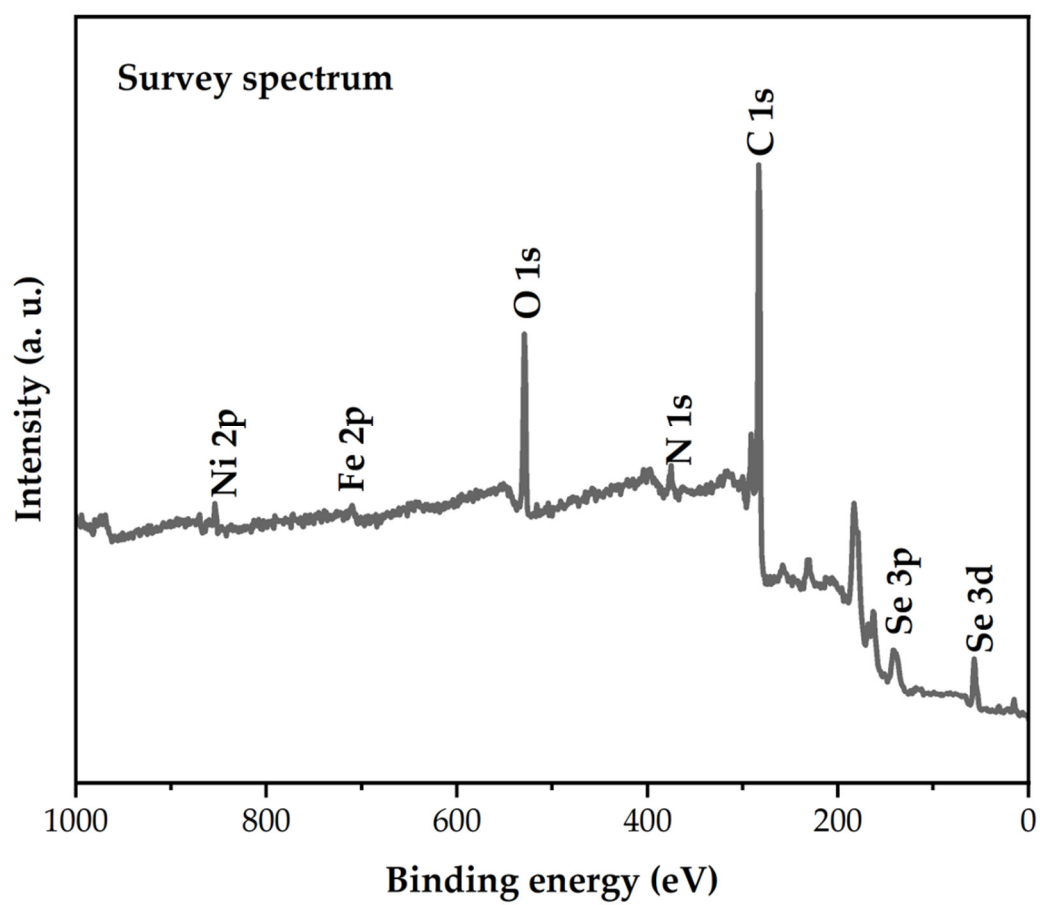

**Figure S4.** Survey XPS spectra of NiFeSe/CFP.

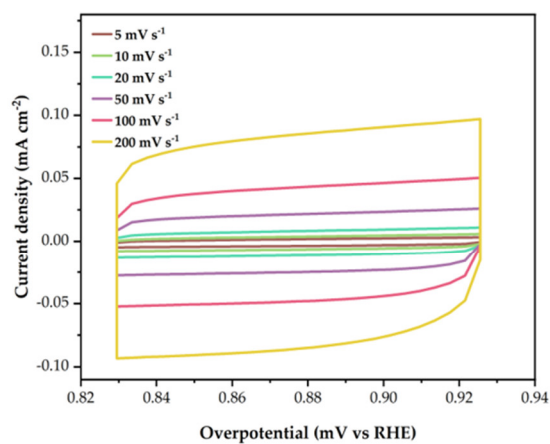

(a)

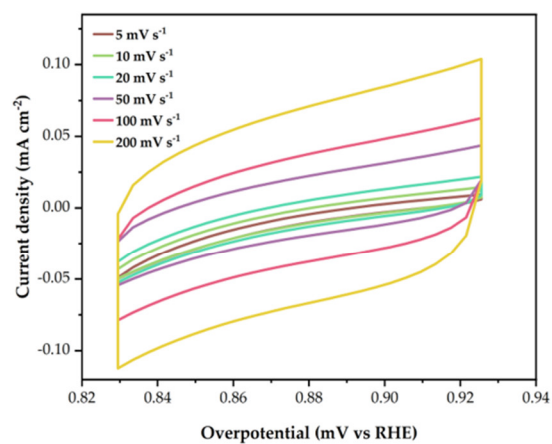

(b)

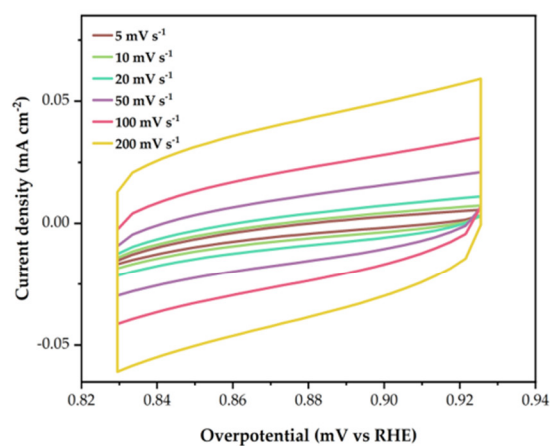

(c)

**Figure S5.** CV curves in the double layer region with various scan rates from 5 to 200 mV s<sup>-1</sup> for (a) NiFeSe/CFP, (b) FeSe/CFP and (c) NiFe PBA/CFP.

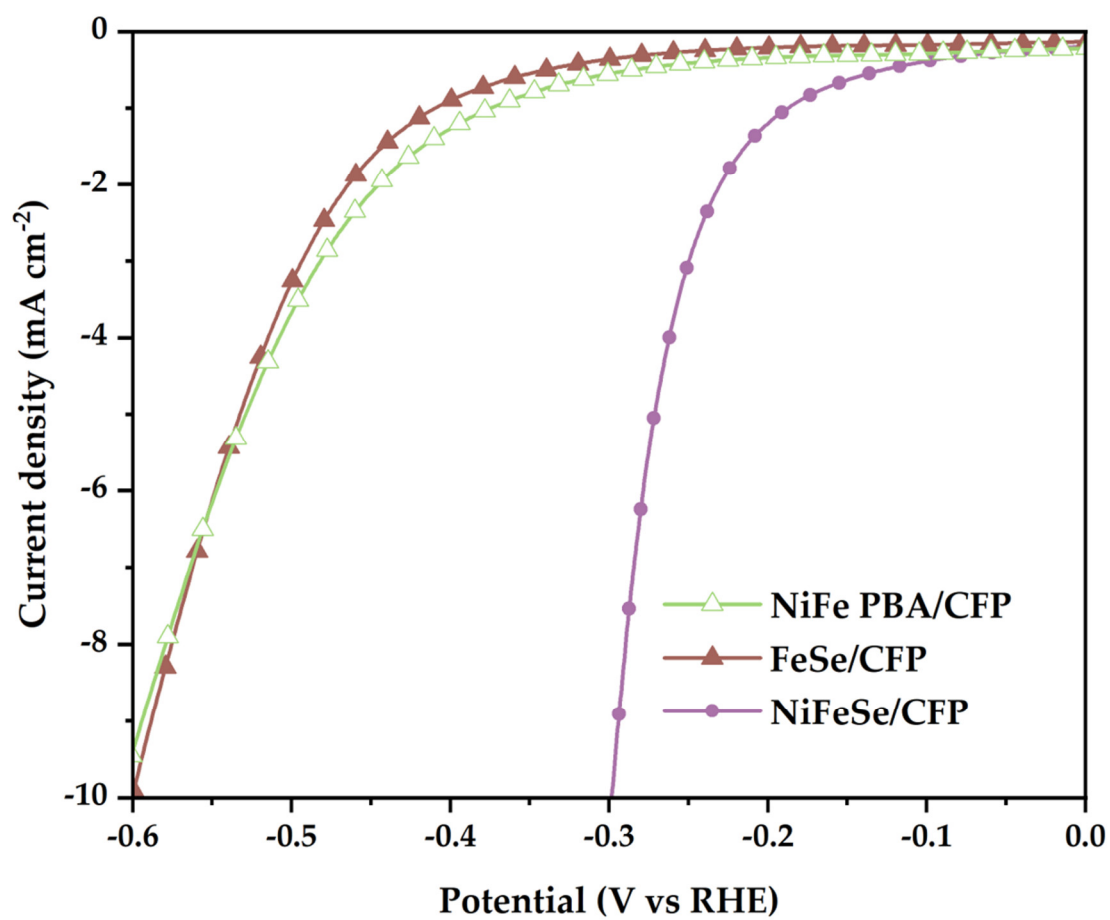

Figure S6. The ECSA normalized HER curves.

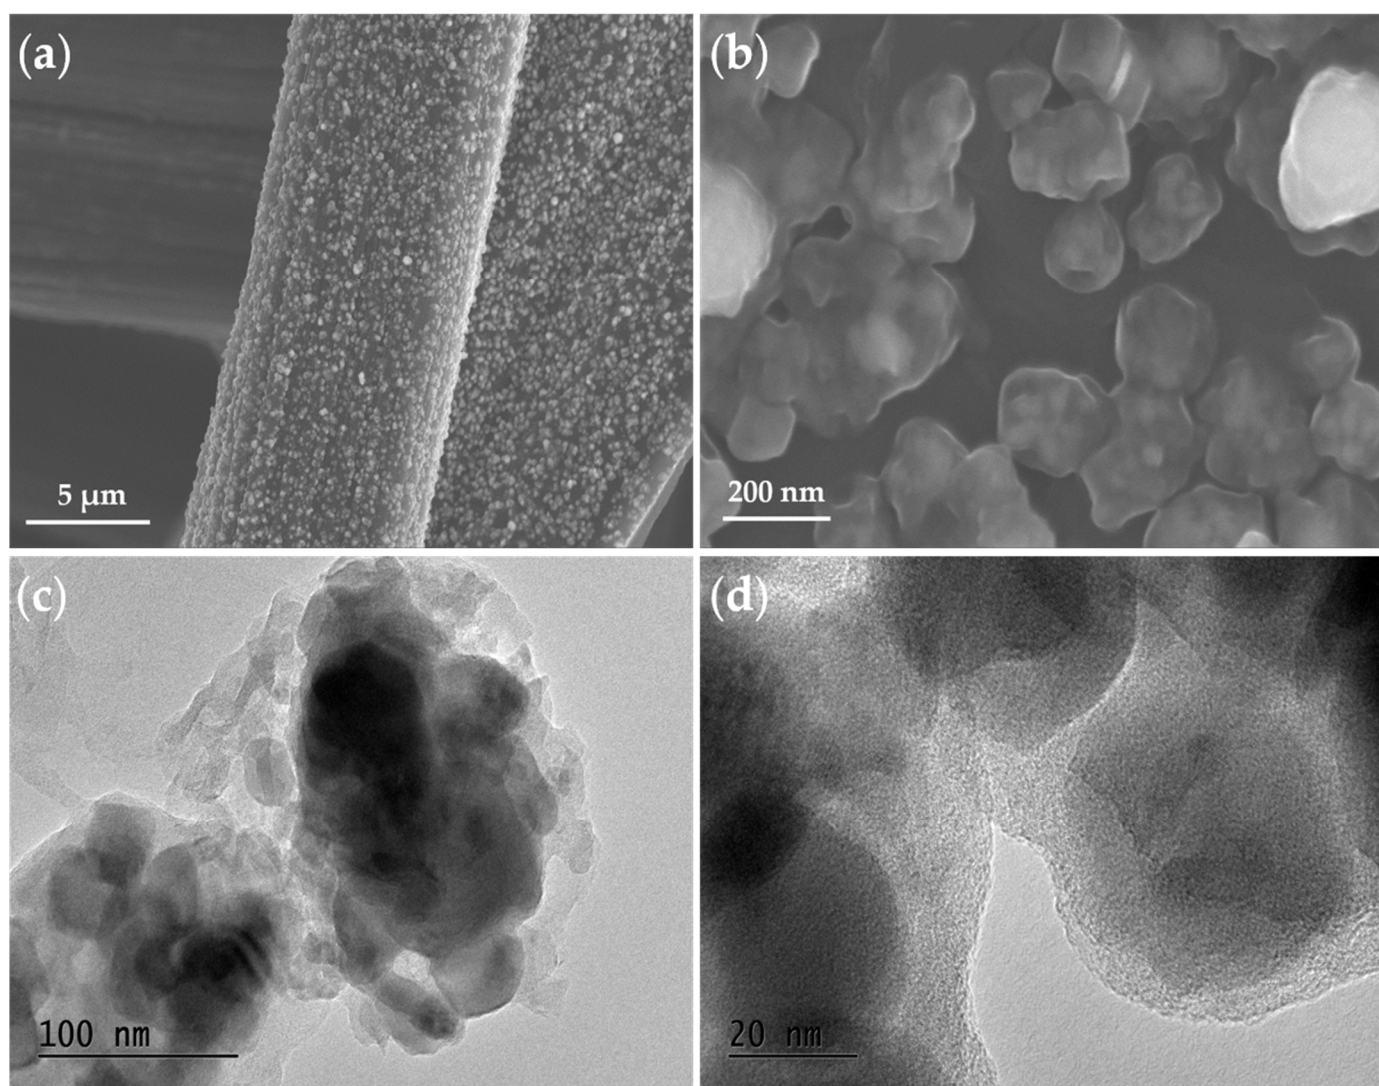

**Figure S7.** (a,b) FESEM and (c,d) TEM images of NiFeSe/CFP after HER stability test.

**Table S1.** ECSA determination of the CFP supported nanocubes.

| Samples      | $C_{dl}$ [ $\text{mF cm}^{-2}$ ] | ECSA [ $\text{cm}^2$ ] |
|--------------|----------------------------------|------------------------|
| NiFeSe/CFP   | 0.41                             | 10.25                  |
| FeSe/CFP     | 0.34                             | 8.5                    |
| NiFe PBA/CFP | 0.20                             | 5                      |



**Table S2.** Comparison of the HER electrochemical performance overpotentials ( $\eta_{10}$ ) and Tafel slopes for similar composite materials reported in literature.

| Catalysts                             | Electrolytes | $\eta_{10}$ [mV] | Tafel slope [mV dec <sup>-1</sup> ] | Refs.     |
|---------------------------------------|--------------|------------------|-------------------------------------|-----------|
| NiFeSe/CFP                            | 1.0 KOH      | 186              | 52                                  | This work |
| FeSe/CFP                              | 1.0 KOH      | 423              | 81                                  | This work |
| NiFe PBA/CFP                          | 1.0 KOH      | 445              | 116                                 | This work |
| NiFeSe/CFP                            | 6.0 KOH      | 132              | -                                   | This work |
| FeCo-FeCoNi                           | 1.0 KOH      | 211              | 77                                  | 1         |
| Ni <sub>90</sub> Fe <sub>10</sub> /CP | 1.0 KOH      | 246              | 95.4                                | 2         |
| NiMoO <sub>x</sub> /NiMoS             | 1.0 KOH      | 236              | 96                                  | 3         |
| Fe <sub>3</sub> C-Co/NC               | 1.0 KOH      | 238              | 108.8                               | 4         |
| Mn-MoP                                | 1.0 KOH      | 198              | 110.69                              | 5         |
| NiFeP@N-CS                            | 1.0 KOH      | 186              | 112                                 | 6         |
| CoSe/NiFe LDH                         | 1.0 KOH      | 260              | 125                                 | 7         |
| Ni <sub>3</sub> S <sub>2</sub>        | 1.0 KOH      | 240              | 113                                 | 8         |
| Ni <sub>0.85</sub> Se flims/GS        | 1.0 NaOH     | 200              | -                                   | 9         |
| Ni <sub>0.75</sub> Se nanocrystal     | 1.0 KOH      | 233              | 86                                  | 10        |
| Ra-Ni                                 | 6.0 KOH      | 22               | -                                   | 11        |

## References

1. Yang, Y.; Lin, Z.; Gao, S.; Su, J.; Lun, Z.; Xia, G.; Chen, J.; Zhang, R.; Chen, Q. Tuning electronic structures of nonprecious ternary alloys encapsulated in graphene layers for optimizing overall water splitting activity. *Acs Catal.* **2017**, *7*, 469–479.
2. Lee, J.; Son, N.; Shin, J.; Pandey, S.; Joo, S.W.; Kang, M. Highly efficient hydrogen evolution reaction performance and long-term stability of spherical Ni<sub>100-x</sub>Fe<sub>x</sub> alloy grown directly on a carbon paper electrode. *J. Alloys Compd.* **2021**, *869*, 159265.
3. Yang, C.C.; Zai, S.F.; Zhou, Y.T.; Du, L.; Jiang, Q. Fe<sub>3</sub>C-Co nanoparticles encapsulated in a hierarchical structure of N-doped carbon as a multifunctional electrocatalyst for ORR, OER, and HER. *Adv. Funct. Mater.* **2019**, *29*, 1901949.
4. Zhai, P.; Zhang, Y.; Wu, Y.; Gao, J.; Zhang, B.; Cao, S.; Zhang, Y.; Li, Z.; Sun, L.; Hou, J. Engineering active sites on hierarchical transition bimetal oxides/sulfides heterostructure array enabling robust overall water splitting. *Nat. Commun.* **2020**, *11*, 1–12.
5. Liu, J.; Li, W.; Cui, Z.; Li, J.; Yang, F.; Huang, L.; Ma, C.; Zeng, M. CoMn phosphide encapsulated in nitrogen-doped graphene for electrocatalytic hydrogen evolution over a broad pH range. *Chem. Commun.* **2021**, *57*, 2400–2403.
6. Hei, J.; Xu, G.; Wei, B.; Zhang, L.; Ding, H.; Liu, D. NiFeP nanosheets on N-doped carbon sponge as a hierarchically structured bifunctional electrocatalyst for efficient overall water splitting. *Appl. Surf. Sci.* **2021**, *549*, 149297.
7. Tan, Y.; Wang, H.; Liu, P.; Shen, Y.; Cheng, C.; Hirata, A.; Fujita, T.; Tang, Z.; Chen, M. Versatile nanoporous bimetallic phosphides towards electrochemical water splitting. *Energy Environ. Sci.* **2016**, *9*, 2257–2261.
8. Kou, T.; Smart, T.; Yao, B.; Chen, I.; Thota, D.; Ping, Y.; Li, Y. Theoretical and experimental insight into the effect of nitrogen doping on hydrogen evolution activity of Ni<sub>3</sub>S<sub>2</sub> in alkaline medium. *Adv. Energy Mater.* **2018**, *8*, 1703538.
9. Wu, X.; He, D.; Zhang, H.; Li, H.; Li, Z.; Yang, B.; Lin, Z.; Lei, L.; Zhang, X. Ni<sub>0.85</sub>Se as an efficient non-noble bifunctional electrocatalyst for full water splitting. *Int. J. Hydrog. Energy* **2016**, *41*, 10688–10694.
10. Zheng, X.; Han, X.; Liu, H.; Chen, J.; Fu, D.; Wang, J.; Zhong, C.; Deng, Y.; Hu, W. Controllable synthesis of Ni<sub>x</sub>Se (0.5 ≤ x ≤ 1) nanocrystals for efficient rechargeable zinc-air batteries and water splitting. *ACS Appl. Mater. Interfaces* **2018**, *10*, 13675–13684.
11. Colli, A.N.; Girault, H.H.; Battistel, A. Non-Precious Electrodes for Practical Alkaline Water Electrolysis. *Materials* **2019**, *12*, 1336. <https://doi.org/10.3390/ma12081336>
